# Supplementary material
Source: PubMed Central journal article supplement (PMC6121995)
Supplement: zam018188728s1.pdf [file zam018188728s1.pdf]

## Supplemental information

### **A colicin M-type bacteriocin from *Pseudomonas aeruginosa* targeting the HxuC heme receptor requires a novel immunity partner**

Maarten G. K. Ghequire<sup>1\*</sup>, Başak Öztürk<sup>2</sup>

<sup>1</sup> Centre of Microbial and Plant Genetics, KU Leuven, Kasteelpark Arenberg 20 bus 2460, 3001 Heverlee, Belgium

<sup>2</sup> Leibniz-Institut DSMZ-Deutsche Sammlung von Mikroorganismen und Zellkulturen, Braunschweig, Germany

\*Corresponding author: maarten.ghequire@kuleuven.be; tel: +32 16 376638, fax: +32 16 321963

Table S1. Strains used in this study.

| Species                       | Strain       | Characteristics/Source                | Growth inhibition by <i>PaeM4</i> <sup>a</sup> | Presence <i>paeM4</i> locus | References |
|-------------------------------|--------------|---------------------------------------|------------------------------------------------|-----------------------------|------------|
| <i>Escherichia coli</i>       | BL21(DE3)    | Production of His-tagged bacteriocins |                                                |                             | Novagen    |
|                               | DH5 $\alpha$ | Plasmid propagation                   |                                                |                             | Invitrogen |
| <i>Pseudomonas aeruginosa</i> | CF_PA1       | CF patient                            | -                                              | <i>pmiC</i> (orphan)        | (1)        |
|                               | CF_PA4       | CF patient                            | -                                              | <i>pmiC</i> (orphan)        | (1)        |
|                               | CF_PA12      | CF patient                            | -                                              | <i>pmiC</i> (orphan)        | (1)        |
|                               | CF_PA17      | CF patient                            | -                                              | <i>pmiC</i> (orphan)        | (1)        |
|                               | CF_PA20      | CF patient                            | -                                              | <i>pmiC</i> (orphan)        | (1)        |
|                               | CF_PA28      | CF patient                            | +                                              | No                          | (1)        |
|                               | CF_PA33      | CF patient                            | +                                              | No                          | (1)        |
|                               | CF_PA36      | CF patient                            | +                                              | No                          | (1)        |
|                               | CF_PA37      | CF patient                            | +                                              | No                          | (1)        |
|                               | CF_PA38      | CF patient                            | +                                              | No                          | (1)        |
|                               | CF_PA41      | CF patient                            | +                                              | <i>pmiC</i> (orphan)        | (1)        |
|                               | CF_PA57      | CF patient                            | -                                              | <i>pmiC</i> (orphan)        | (1)        |
|                               | CF_PA58      | CF patient                            | -                                              | <i>pmiC</i> (orphan)        | (1)        |
|                               | CF_PA59      | CF patient                            | -                                              | <i>pmiC</i> (orphan)        | (1)        |
|                               | CF_PA62      | CF patient                            | +                                              | No                          | (1)        |
|                               | CF_PA79      | CF patient                            | +                                              | No                          | (1)        |
|                               | CF_PA86      | CF patient                            | +                                              | No                          | (1)        |
|                               | CF_PA87      | CF patient                            | -                                              | <i>pmiC</i> (orphan)        | (1)        |
|                               | CF_PA94      | CF patient                            | +                                              | No                          | (1)        |
|                               | CF_PA103     | CF patient                            | +                                              | No                          | (1)        |
|                               | CF_PA116     | CF patient                            | +                                              | No                          | (1)        |
|                               | CF_PA117     | CF patient                            | +                                              | No                          | (1)        |
|                               | Pr335        | Hospital environment                  | +                                              | No                          | (2)        |
|                               | W5 Aug28     | River water                           | +                                              | No                          | (3)        |
|                               | LMG 2107     | Shallow well water                    | +                                              | No                          | (2)        |
|                               | W15 Apr4     | River water                           | +                                              | No                          | (4)        |
|                               | Bo559        | Burn wound                            | +                                              | No                          | (2)        |
| Jp97                          | Sea water    | T                                     | No                                             | (5)                         |            |
| Jp100                         | Sea water    | T                                     | No                                             | (4)                         |            |
| TA08                          | Sputum       | +                                     | No                                             | (5)                         |            |
| Is580                         | Burn wound   | +                                     | No                                             | (2)                         |            |
| A19                           | Wound        | +                                     | No                                             | (5)                         |            |
| W15 Dec4                      | River water  | +                                     | No                                             | (3)                         |            |
| W15 Oct31                     | River water  | +                                     | No                                             | (4)                         |            |
| Br776                         | Throat       | -                                     | <i>pmiC</i> (orphan)                           | (5)                         |            |
| Br670                         | Sputum       | +                                     | No                                             | (2)                         |            |
| Br906                         | Nose         | +                                     | No                                             | (2)                         |            |

|                                              |            |                                           |   |                      |      |
|----------------------------------------------|------------|-------------------------------------------|---|----------------------|------|
|                                              | Li004      | CF patient                                | - | <i>pmiC</i> (orphan) | (2)  |
|                                              | Is579      | Burn wound                                | - | <i>pmiC</i> (orphan) | (2)  |
|                                              | Br908      | Throat                                    | + | No                   | (2)  |
|                                              | CPHL 6750  | Urine                                     | + | No                   | (5)  |
|                                              | CPHL 2000  | Wound                                     | + | <i>pmiC</i> (orphan) | (5)  |
|                                              | Us448      | Urine                                     | + | No                   | (2)  |
|                                              | TuD47      | Ascite                                    | - | <i>pmiC</i> (orphan) | (2)  |
|                                              | Br262      | Tap water room burn wound center          | + | No                   | (5)  |
|                                              | Bu002      | Wound                                     | - | <i>pmiC</i> (orphan) | (5)  |
|                                              | Pr317      | Burn                                      | - | <i>pmiC</i> (orphan) | (5)  |
|                                              | Pr334      | Hospital environment                      | - | <i>pmiC</i> (orphan) | (5)  |
|                                              | W15 Dec14  | River water                               | - | <i>pmiC</i> (orphan) | (3)  |
|                                              | Is582      | Burn wound                                | - | <i>pmiC</i> (orphan) | (5)  |
|                                              | Is573      | Burn wound                                | - | <i>pmiC</i> (orphan) | (2)  |
|                                              | So092      | Burn wound                                | - | <i>pmiC</i> (orphan) | (2)  |
|                                              | Aa246      | Burn wound                                | + | No                   | (2)  |
|                                              | Br678      | Burn wound                                | - | <i>pmiC</i> (orphan) | (5)  |
|                                              | So123      | Hospital environment                      | + | No                   | (5)  |
|                                              | Br817      | Wound                                     | - | <i>pmiC</i> (orphan) | (5)  |
|                                              | Bo562      | Blood                                     | - | <i>pmiC</i> (orphan) | (5)  |
|                                              | So098      | Wound                                     | - | <i>pmiC</i> (orphan) | (2)  |
|                                              | Br993      | Sputum                                    | + | No                   | (2)  |
|                                              | Br229      | Hospital                                  | + | No                   | (2)  |
|                                              | Br680      | Burn wound                                | + | No                   | (2)  |
|                                              | PA7        | Wound                                     | + | No                   | (6)  |
|                                              | Us451      | Burn wound                                | - | <i>paeM4-pmiC</i>    | (5)  |
|                                              | ATCC 27853 | Blood                                     | + | No                   | (2)  |
|                                              | Bu007      | Burn wound                                | - | <i>pmiC</i> (orphan) | (2)  |
|                                              | PAO1       | Wound                                     | + | No                   | (7)  |
|                                              | PA229      | Clinical isolate                          | - | <i>pmiC</i> (orphan) | (8)  |
|                                              | PA62       | Clinical isolate                          | - | <i>pmiC</i> (orphan) | (9)  |
|                                              | PA63       | Clinical isolate                          | - | <i>pmiC</i> (orphan) | (10) |
|                                              | PABL056    | Blood                                     | - | <i>pmiC</i> (orphan) | (11) |
|                                              | HB15       | Sputum                                    | - | <i>pmiC</i> (orphan) | (12) |
|                                              | SCV20265   | CF patient                                | - | <i>paeM4-pmiC</i>    | (13) |
|                                              | LMG 1242   | Source unknown                            | - | <i>pmiC</i> (orphan) | (14) |
|                                              | LMG 1272   | Cultivated mushroom                       | + | No                   | (10) |
|                                              | PA45       | Blood                                     | + | No                   | (15) |
| Transposon mutants <i>P. aeruginosa</i> PAO1 |            |                                           |   |                      |      |
|                                              | PA0151     | PAO1 mutant hit in PA0151                 | + | No                   | (16) |
|                                              | PA0192     | PAO1 mutant hit in PA0192                 | + | No                   | (16) |
|                                              | PA0434     | PAO1 mutant hit in PA0434                 | + | No                   | (16) |
|                                              | PA0470     | PAO1 mutant hit in PA0470 ( <i>fiuA</i> ) | + | No                   | (16) |

|  |        |                                           |   |    |      |
|--|--------|-------------------------------------------|---|----|------|
|  | PA0674 | PAO1 mutant hit in PA0674 ( <i>pigC</i> ) | + | No | (16) |
|  | PA0781 | PAO1 mutant hit in PA0781                 | + | No | (16) |
|  | PA0931 | PAO1 mutant hit in PA0931 ( <i>pirA</i> ) | + | No | (16) |
|  | PA1271 | PAO1 mutant hit in PA1271                 | + | No | (16) |
|  | PA1302 | PAO1 mutant hit in PA1302 ( <i>hxuC</i> ) | - | No | (16) |
|  | PA1322 | PAO1 mutant hit in PA1322 ( <i>pfuA</i> ) | + | No | (16) |
|  | PA1365 | PAO1 mutant hit in PA1365                 | + | No | (16) |
|  | PA1613 | PAO1 mutant hit in PA1613                 | + | No | (16) |
|  | PA1910 | PAO1 mutant hit in PA1910 ( <i>femA</i> ) | + | No | (16) |
|  | PA1922 | PAO1 mutant hit in PA1922                 | + | No | (16) |
|  | PA2057 | PAO1 mutant hit in PA2057                 | + | No | (16) |
|  | PA2070 | PAO1 mutant hit in PA2070                 | + | No | (16) |
|  | PA2089 | PAO1 mutant hit in PA2089                 | + | No | (16) |
|  | PA2289 | PAO1 mutant hit in PA2289                 | + | No | (16) |
|  | PA2335 | PAO1 mutant hit in PA2335 ( <i>optO</i> ) | + | No | (16) |
|  | PA2398 | PAO1 mutant hit in PA2398 ( <i>fpvA</i> ) | + | No | (16) |
|  | PA2466 | PAO1 mutant hit in PA2466 ( <i>optS</i> ) | + | No | (16) |
|  | PA2590 | PAO1 mutant hit in PA2590                 | + | No | (16) |
|  | PA2688 | PAO1 mutant hit in PA2688 ( <i>pfeA</i> ) | + | No | (16) |
|  | PA2911 | PAO1 mutant hit in PA2911                 | + | No | (16) |
|  | PA3268 | PAO1 mutant hit in PA3268                 | + | No | (16) |
|  | PA3408 | PAO1 mutant hit in PA3408 ( <i>hasR</i> ) | + | No | (16) |
|  | PA3790 | PAO1 mutant hit in PA3790 ( <i>oprC</i> ) | + | No | (16) |
|  | PA3901 | PAO1 mutant hit in PA3901 ( <i>fecA</i> ) | + | No | (16) |
|  | PA4156 | PAO1 mutant hit in PA4156                 | + | No | (16) |
|  | PA4168 | PAO1 mutant hit in PA4168 ( <i>fpvB</i> ) | + | No | (16) |
|  | PA4221 | PAO1 mutant hit in PA4221 ( <i>fpvA</i> ) | + | No | (16) |
|  | PA4514 | PAO1 mutant hit in PA4514 ( <i>piuA</i> ) | + | No | (16) |
|  | PA4675 | PAO1 mutant hit in PA4675                 | + | No | (16) |
|  | PA4710 | PAO1 mutant hit in PA4710 ( <i>phuR</i> ) | + | No | (16) |
|  | PA4837 | PAO1 mutant hit in PA4837                 | + | No | (16) |
|  | PA4897 | PAO1 mutant hit in PA4897 ( <i>optI</i> ) | + | No | (16) |

<sup>a</sup> Growth inhibition by Paem4, +; no growth inhibition by Paem4, -. A non-transparent halo indicative of reduced cell density compared with the cell lawn is marked with T (turbid halo).

Table S2. List of plasmids used in this study.

| Plasmid   | Characteristics                                                                                                                                                                 | Reference  |
|-----------|---------------------------------------------------------------------------------------------------------------------------------------------------------------------------------|------------|
| pET28a(+) | pBR322 origin, His-tag/thrombin/T7 tag; Km <sup>R</sup>                                                                                                                         | Novagen    |
| pJB3Tc20  | Broad-host-range cloning vector, IncP; Ap <sup>R</sup> , Tc <sup>R</sup>                                                                                                        | (17)       |
| pMMB67EH  | Broad-host-range cloning vector, IncQ; Gm <sup>R</sup>                                                                                                                          | (18)       |
| pCMPG6250 | pET28a(+) with 866-bp PCR-amplified fragment containing <i>paeM</i> (locus tag ERS445055_00256) from <i>P. aeruginosa</i> NCTC 10332 cloned in NcoI/XhoI                        | (19)       |
| pCMPG6252 | pJB3Tc20 with 467-bp PCR-amplified containing <i>pmiA</i> (no annotation of immunity gene downstream of <i>paeM</i> ) from <i>P. aeruginosa</i> NCTC 10332 cloned in PstI/EcoRI | (19)       |
| pCMPG6283 | pET28a(+) with 1025-bp PCR-amplified fragment containing <i>paeM4</i> (locus tag Q057_04089) from <i>P. aeruginosa</i> BL03 cloned in NcoI/XhoI                                 | This study |
| pCMPG6287 | pJB3Tc20 with 739-bp PCR-amplified containing <i>pmiC</i> (locus tag Q057_04090) from <i>P. aeruginosa</i> BL03 cloned in PstI/EcoRI                                            | This study |
| pCMPG6293 | pMMB67EH with 2727-bp PCR-amplified fragment containing <i>hxuC</i> (locus tag PA1302) from <i>P. aeruginosa</i> PAO1 cloned in EcoRI/HindIII                                   | This study |

## References

1. Dingemans J, Ye L, Hildebrand F, Tontodonati F, Craggs M, Bilocq F, De Vos D, Crabbé A, Van Houdt R, Malfroot A, Cornelis P. 2014. The deletion of TonB-dependent receptor genes is part of the genome reduction process that occurs during adaptation of *Pseudomonas aeruginosa* to the cystic fibrosis lung. *Pathog Dis* 71:26-38.
2. van Belkum A, Soriaga LB, LaFave MC, Akella S, Veyrieras JB, Barbu EM, Shortridge D, Blanc B, Hannum G, Zambardi G, Miller K, Enright MC, Mugnier N, Brami D, Schicklin S, Felderman M, Schwartz AS, Richardson TH, Peterson TC, Hubby B, Cady KC. 2015. Phylogenetic Distribution of CRISPR-Cas Systems in Antibiotic-Resistant *Pseudomonas aeruginosa*. *mBio* 6:e01796-15.
3. Pirnay JP, Matthijs S, Colak H, Chablain P, Bilocq F, Van Eldere J, De Vos D, Zizi M, Triest L, Cornelis P. 2005. Global *Pseudomonas aeruginosa* biodiversity as reflected in a Belgian river. *Environ Microbiol* 7:969-980.
4. Pirnay JP, Blasdel BG, Bretaudeau L, Buckling A, Chanishvili N, Clark JR, Corte-Real S, Debarbieux L, Dublanchet A, De Vos D, Gabard J, Garcia M, Goderdzishvili M, Górski A, Hardcastle J, Huys I, Kutter E, Lavigne R, Merabishvili M, Olchawa E, Parikka KJ, Patey O, Pouilot F, Resch G, Rohde C, Scheres J, Skurnik M, Vaneechoutte M, Van Parys L, Verbeken G, Zizi M, Van den Eede G. 2015. Quality and safety requirements for sustainable phage therapy products. *Pharm Res* 32:2173-2179.
5. Pirnay JP, Bilocq F, Pot B, Cornelis P, Zizi M, Van Eldere J, Deschaght P, Vaneechoutte M, Jennes S, Pitt T, De Vos D. 2009. *Pseudomonas aeruginosa* population structure revisited. *PLoS One* 4:e7740.
6. Roy PH, Tetu SG, Larouche A, Elbourne L, Tremblay S, Ren Q, Dodson R, Harkins D, Shay R, Watkins K, Mahamoud Y, Paulsen IT. 2010. Complete genome sequence of the multiresistant taxonomic outlier *Pseudomonas aeruginosa* PA7. *PLoS One* 5:e8842.
7. Stover CK, Pham XQ, Erwin AL, Mizoguchi SD, Warrenner P, Hickey MJ, Brinkman FS, Hufnagle WO, Kowalik DJ, Lagrou M, Garber RL, Goltry L, Tolentino E, Westbrook-Wadman S, Yuan Y, Brody LL, Coulter SN, Folger KR, Kas A, Larbig K, Lim R, Smith K, Spencer D, Wong GK, Wu Z, Paulsen IT, Reizer J, Saier MH, Hancock RE, Lory S, Olson MV. 2000. Complete genome sequence of *Pseudomonas aeruginosa* PAO1, an opportunistic pathogen. *Nature* 406:959-964.
8. Buyck JM, Luyckx C, Muccioli GG, Krause KM, Nichols WW, Tulkens PM, Van Bambeke F. 2017. Pharmacodynamics of ceftazidime/avibactam against extracellular and intracellular forms of *Pseudomonas aeruginosa*. *J Antimicrob Chemother* 72:1400-1409.
9. Defraigne V, Verstraete L, Van Bambeke F, Anantharajah A, Townsend EM, Ramage G, Corbau R, Marchand A, Chaltin P, Fauvart M, Michiels J. 2017. Antibacterial Activity of 1-[(2,4-Dichlorophenethyl)amino]-3-Phenoxypropan-2-ol against Antibiotic-Resistant Strains of Diverse Bacterial Pathogens, Biofilms and in Pre-clinical Infection Models. *Front Microbiol* 8:2585.
10. Ghequire MG, Dingemans J, Pirnay JP, De Vos D, Cornelis P, De Mot R. 2014. O serotype-independent susceptibility of *Pseudomonas aeruginosa* to lectin-like pyocins. *Microbiologyopen* 3:875-884.
11. Ozer EA, Allen JP, Hauser AR. 2012. Draft genome sequence of the *Pseudomonas aeruginosa* bloodstream isolate PABL056. *J Bacteriol* 194:5999.
12. Soares-Castro P, Marques D, Demyanchuk S, Faustino A, Santos PM. 2011. Draft genome sequences of two *Pseudomonas aeruginosa* clinical isolates with different antibiotic susceptibilities. *J Bacteriol* 193:5573.
13. Eckweiler D, Bunk B, Spröer C, Overmann J, Häussler S. 2014. Complete Genome Sequence of Highly Adherent *Pseudomonas aeruginosa* Small-Colony Variant SCV20265. *Genome Announc* 2:e01232-13.
14. Nakano K, Terabayashi Y, Shiroma A, Shimoji M, Tamotsu H, Ashimine N, Ohki S, Shinzato M, Teruya K, Satou K, Hirano T. 2015. First Complete Genome Sequence of *Pseudomonas aeruginosa*

- (Schroeter 1872) Migula 1900 (DSM 50071<sup>T</sup>), Determined Using PacBio Single-Molecule Real-Time Technology. *Genome Announc* 3:e00932-15.
15. Segata N, Ballarini A, Jousson O. 2013. Genome Sequence of *Pseudomonas aeruginosa* PA45, a Highly Virulent Strain Isolated from a Patient with Bloodstream Infection. *Genome Announc* 1:e00289-13.
  16. Jacobs MA, Alwood A, Thaipisuttikul I, Spencer D, Haugen E, Ernst S, Will O, Kaul R, Raymond C, Levy R, Chun-Rong L, Guenther D, Bovee D, Olson MV, Manoil C. 2003. Comprehensive transposon mutant library of *Pseudomonas aeruginosa*. *Proc Natl Acad Sci U S A* 100:14339-14344.
  17. Blatny JM, Brautaset T, Winther-Larsen HC, Haugan K, Valla S. 1997. Construction and use of a versatile set of broad-host-range cloning and expression vectors based on the RK2 replicon. *Appl Environ Microbiol* 63:370-379.
  18. Christen M, Kulasekara HD, Christen B, Kulasekara BR, Hoffman LR, Miller SI. 2010. Asymmetrical distribution of the second messenger c-di-GMP upon bacterial cell division. *Science* 328:1295-1297.
  19. Ghequire MG, Kemland L, De Mot R. 2017. Novel immunity proteins associated with colicin M-like bacteriocins exhibit promiscuous protection in *Pseudomonas*. *Front Microbiol* 8:93.
